# Supplementary material
Source: PubMed Central journal article supplement (PMC8064766)
Supplement: mmc1.pdf [file mmc1.pdf]

# THE LANCET Microbe

## Supplementary appendix

This appendix formed part of the original submission and has been peer reviewed.  
We post it as supplied by the authors.

Supplement to: Fischer N, Dauby N, Bossuyt N, et al. Monitoring of human coronaviruses in Belgian primary care and hospitals, 2015–20: a surveillance study. *Lancet Microbe* 2021; published online January 27. [https://doi.org/10.1016/S2666-5247\(20\)30221-4](https://doi.org/10.1016/S2666-5247(20)30221-4).

## TABLE OF CONTENTS

---

|          |                                                                                                                                                                                                                       |           |
|----------|-----------------------------------------------------------------------------------------------------------------------------------------------------------------------------------------------------------------------|-----------|
| <b>1</b> | <b>SUPPLEMENTARY TABLES:</b> .....                                                                                                                                                                                    | <b>1</b>  |
| 1.1      | <b>Supplementary Table 1:</b> Test results from the respiratory virus panel of primary care and hospital patient samples during the winter seasons in Belgium 2015-2020 .....                                         | 1         |
| 1.2      | <b>Supplementary Table 2:</b> Coinfections with other respiratory viruses among seasonal coronavirus positive patients in Belgium 2015-2020 per age group. ....                                                       | 2         |
| 1.3      | <b>Supplementary Table 3:</b> Incidence rate of coronavirus infection per 100.000 person-months per winter season in Belgium 2015-2020. ....                                                                          | 3         |
| 1.4      | <b>Supplementary Table 4:</b> Incidence rate of total coronavirus infection, as well as split without and with coinfection, per age group per 100.000 person-months in Belgium 2015-2020. ....                        | 4         |
| 1.5      | <b>Supplementary Table 5:</b> Complications or death in hospitalized patients with seasonal coronavirus infection without and with coinfection with other respiratory viruses by age group in Belgium 2015-2020. .... | 6         |
| <b>2</b> | <b>SUPPLEMENTARY FIGURES</b> .....                                                                                                                                                                                    | <b>7</b>  |
| 2.1      | <b>Supplementary Figure 1:</b> Detection of SARS-CoV2 emergence through the primary care (ILI) (A) and hospital (SARI) (B) sentinel surveillance systems in Belgium 2020. ....                                        | 7         |
| <b>3</b> | <b>SUPPLEMENTARY METHODS</b> .....                                                                                                                                                                                    | <b>8</b>  |
| 3.1      | <b>Laboratory methods and materials</b> .....                                                                                                                                                                         | <b>8</b>  |
| 3.1.1    | PCR primers and probes .....                                                                                                                                                                                          | 8         |
| 3.1.2    | PCR reagents and protocol for respiratory virus multiplex RT-qPCR .....                                                                                                                                               | 9         |
| 3.1.3    | PCR reagents and protocol for SARS-CoV-2 RT-qPCR .....                                                                                                                                                                | 10        |
| 3.1.4    | Material and equipment used .....                                                                                                                                                                                     | 10        |
| 3.2      | <b>Surveillance Data collection and analysis</b> .....                                                                                                                                                                | <b>10</b> |
| 3.2.1    | ILI and SARI surveillance in Belgium .....                                                                                                                                                                            | 10        |
| 3.2.2    | Sample and data collection .....                                                                                                                                                                                      | 11        |
| 3.2.3    | Determination of the GP and sentinel hospital catchment population.....                                                                                                                                               | 11        |
| 3.2.4    | Data analysis tools.....                                                                                                                                                                                              | 12        |

# 1 SUPPLEMENTARY TABLES:

## 1.1 SUPPLEMENTARY TABLE 1: TEST RESULTS FROM THE RESPIRATORY VIRUS PANEL OF PRIMARY CARE AND HOSPITAL PATIENT SAMPLES DURING THE WINTER SEASONS IN BELGIUM 2015-2020

|                                  | <b>Primary Care, n (%<sup>C</sup>)</b> | <b>Hospital, n (%<sup>C</sup>)</b> |
|----------------------------------|----------------------------------------|------------------------------------|
|                                  | <b>Total N = 2,573</b>                 | <b>Total N = 6,494</b>             |
| <b>Coronaviruses</b>             |                                        |                                    |
| HCoV-OC43                        | 87 (3.4%)                              | 196 (3.0%)                         |
| HCoV-229E                        | 39 (1.5%)                              | 91 (1.4%)                          |
| HCoV-NL63                        | 35 (1.4%)                              | 84 (1.3%)                          |
| Multiple Coronaviruses           | 2 (0.1%)                               | 5 (0.1%)                           |
| <b>Other Respiratory Viruses</b> |                                        |                                    |
| Influenza viruses                | 1,328 (51.6%)                          | 2,425 (37.3%)                      |
| RSV                              | 87 (3.4%)                              | 752 (11.6%)                        |
| Picornaviruses                   | 189 (7.3%)                             | 693 (10.7%)                        |
| hMPV                             | 75 (2.9%)                              | 485 (7.5%)                         |
| Adenovirus                       | 32 (1.2%)                              | 378 (5.8%)                         |
| Bocavirus                        | 5 (0.2%)                               | 178 (2.8%)                         |
| Parainfluenza viruses            | 31 (1.2%)                              | 163 (2.5%)                         |

<sup>C</sup> Percentage per column

Abbreviations: HCoV = human coronavirus, RSV = respiratory syncytial viruses, hMPV = human metapneumoviruses.

## 1.2 SUPPLEMENTARY TABLE 2: COINFECTIONS WITH OTHER RESPIRATORY VIRUSES AMONG SEASONAL CORONAVIRUS POSITIVE PATIENTS IN BELGIUM 2015-2020 PER AGE GROUP.

|                                  | Primary care sCoV patients, n (% <sup>C</sup> ) |         |          |                        |                     | Hospital sCoV patients, n (% <sup>C</sup> ) |                      |                      |                       |                      |
|----------------------------------|-------------------------------------------------|---------|----------|------------------------|---------------------|---------------------------------------------|----------------------|----------------------|-----------------------|----------------------|
|                                  | Total<br>(N = 161)                              | 0-4 y/o | 5-14 y/o | 15-64 y/o<br>(N = 143) | 65+ y/o<br>(N = 18) | Total<br>(N = 371)                          | 0-4 y/o<br>(N = 137) | 5-14 y/o<br>(N = 10) | 15-64 y/o<br>(N = 74) | 65+ y/o<br>(N = 150) |
| <b>Coinfections</b>              |                                                 |         |          |                        |                     |                                             |                      |                      |                       |                      |
| With respiratory viruses         | 43 (26.7%)                                      | ..      | ..       | 38 (26.6%)             | 5 (27.8%)           | 161 (43.4%)                                 | 89 (65.0%)           | 6 (60.0%)            | 24 (32.4%)            | 42 (28.0%)           |
| <b>Other Respiratory Viruses</b> |                                                 |         |          |                        |                     |                                             |                      |                      |                       |                      |
| Influenza                        | 34 (21.1%)                                      | ..      | ..       | 30 (21.0%)             | 4 (22.2%)           | 67 (18.1%)                                  | 19 (13.9%)           | 4 (40.0%)            | 17 (23.0%)            | 27 (18.0%)           |
| RSV                              | 3 (1.9%)                                        | ..      | ..       | 3 (2.1%)               | 0 (0.0%)            | 37 (10.0%)                                  | 31 (22.6%)           | 1 (10.0%)            | 1 (1.4%)              | 4 (2.7%)             |
| Picornaviruses                   | 2 (1.2%)                                        | ..      | ..       | 2 (1.4%)               | 0 (0.0%)            | 38 (10.2%)                                  | 24 (17.5%)           | 2 (20.0%)            | 5 (6.8%)              | 7 (4.7%)             |
| Adenovirus                       | 0 (0.0%)                                        | ..      | ..       | 0 (0.0%)               | 0 (0.0%)            | 26 (7.0%)                                   | 23 (16.8%)           | 0 (0.0%)             | 1 (1.4%)              | 2 (1.3%)             |
| hMPV                             | 4 (2.5%)                                        | ..      | ..       | 3 (2.1%)               |                     | 19 (5.1%)                                   | 16 (11.7%)           | 1 (10.0%)            | 0 (0.0%)              | 2 (1.3%)             |
| Parainfluenza Viruses            | 1 (0.6%)                                        | ..      | ..       | 1 (0.7%)               |                     | 10 (2.7%)                                   | 6 (4.4%)             | 0 (0.0%)             | 2 (2.7%)              | 2 (1.3%)             |
| Bocavirus                        | 1 (0.6%)                                        | ..      | ..       | 1 (0.7%)               |                     | 9 (2.5%)                                    | 8 (5.8%)             | 0 (0.0%)             | 1 (1.4%)              | 0 (0.0%)             |

%<sup>C</sup> Percentage per column

Abbreviations: sCoV = seasonal coronavirus, RSV = respiratory syncytial viruses, hMPV = human metapneumoviruses, y/o = years of age.

### 1.3 SUPPLEMENTARY TABLE 3: INCIDENCE RATE OF CORONAVIRUS INFECTION PER 100.000 PERSON-MONTHS PER WINTER SEASON IN BELGIUM 2015-2020.

| Coronavirus | Season    | Primary care |               |      |              |              | Hospital    |               |     |              |              |
|-------------|-----------|--------------|---------------|------|--------------|--------------|-------------|---------------|-----|--------------|--------------|
|             |           | Nr of cases  | Person-months | IR   | Lower 95% CI | Upper 95% CI | Nr of cases | person-months | IR  | Lower 95% CI | Upper 95% CI |
| HCoV-229E   | 2015/2016 | 3            | 4,136,339     | 0.1  | 0.02         | 0.2          | 0           | 3,599,883     | 0   | 0            | 0            |
|             | 2016/2017 | 20           | 3,580,341     | 0.6  | 0.4          | 0.9          | 29          | 2,761,569     | 1.1 | 0.7          | 1.5          |
|             | 2017/2018 | 0            | 4,756,185     | 0    | 0            | 0            | 5           | 4,050,974     | 0.1 | 0.05         | 0.3          |
|             | 2018/2019 | 15           | 3,644,017     | 0.4  | 0.3          | 0.7          | 56          | 3,204,607     | 1.7 | 1.4          | 2.3          |
|             | 2019/2020 | 1            | 2,761,600     | 0.04 | 0.01         | 0.3          | 1           | 2,136,405     | 0   | 0.01         | 0.4          |
| HCoV-NL63   | 2015/2016 | 2            | 4,136,339     | 0.05 | 0.01         | 0.2          | 10          | 3,599,883     | 0.3 | 0.2          | 0.5          |
|             | 2016/2017 | 11           | 3,580,341     | 0.3  | 0.2          | 0.6          | 14          | 2,761,569     | 0.5 | 0.3          | 0.9          |
|             | 2017/2018 | 10           | 4,756,185     | 0.2  | 0.1          | 0.4          | 35          | 4,050,974     | 0.9 | 0.6          | 1.2          |
|             | 2018/2019 | 5            | 3,644,017     | 0.1  | 0.06         | 0.3          | 20          | 3,204,607     | 0.6 | 0.4          | 1.0          |
|             | 2019/2020 | 7            | 2,761,600     | 0.3  | 0.1          | 0.5          | 5           | 2,136,405     | 0.2 | 0.1          | 0.6          |
| HCoV-OC43   | 2015/2016 | 29           | 4,136,339     | 0.7  | 0.5          | 1            | 33          | 3,599,883     | 0.9 | 0.7          | 1.3          |
|             | 2016/2017 | 20           | 3,580,341     | 0.6  | 0.4          | 0.9          | 42          | 2,761,569     | 1.5 | 1.1          | 2            |
|             | 2017/2018 | 13           | 4,756,185     | 0.3  | 0.2          | 0.5          | 32          | 4,050,974     | 0.8 | 0.6          | 1.1          |
|             | 2018/2019 | 14           | 3,644,017     | 0.4  | 0.2          | 0.6          | 74          | 3,204,607     | 2.3 | 1.8          | 2.9          |
|             | 2019/2020 | 11           | 2,761,600     | 0.4  | 0.2          | 0.7          | 15          | 2,136,405     | 0.7 | 0.4          | 1.2          |

Abbreviations: HCoV = human coronavirus, Nr = number, IR = incidence rate, CI = confidence interval.

**1.4 SUPPLEMENTARY TABLE 4: INCIDENCE RATE OF TOTAL SEASONAL CORONAVIRUS INFECTION, AS WELL AS SPLIT WITHOUT AND WITH COINFECTION, PER AGE GROUP PER 100.000 PERSON-MONTHS IN BELGIUM 2015-2020.**

| Coronavirus | Coinfection | Age Group | Primary care |               |      |              |              | Hospital    |               |     |              |              |
|-------------|-------------|-----------|--------------|---------------|------|--------------|--------------|-------------|---------------|-----|--------------|--------------|
|             |             |           | Nr of cases  | Person-months | IR   | Lower 95% CI | Upper 95% CI | Nr of cases | Person-months | IR  | Lower 95% CI | Upper 95% CI |
| HCoV-229E   | Total       | 0-4 y/o   | ..           | ..            | ..   | ..           | ..           | 12          | 877,793       | 1.4 | 0.8          | 2.5          |
|             |             | 5-14 y/o  | ..           | ..            | ..   | ..           | ..           | 3           | 1,776,590     | 0.2 | 0.1          | 0.6          |
|             |             | 15-64 y/o | 36           | 14,795,205    | 0.2  | 0.1          | 0.3          | 25          | 10,149,504    | 0.2 | 0.1          | 0.3          |
|             |             | 65+ y/o   | 3            | 4,083,277     | 0.1  | 0.02         | 0.3          | 51          | 2,949,540     | 1.7 | 1.3          | 2.2          |
|             | Yes         | 0-4 y/o   | ..           | ..            | ..   | ..           | ..           | 10          | 877,793       | 1.1 | 0.6          | 2.1          |
|             |             | 5-14 y/o  | ..           | ..            | ..   | ..           | ..           | 1           | 1,776,590     | 0.1 | 0.01         | 0.4          |
|             |             | 15-64 y/o | 15           | 14,795,205    | 0.1  | 0.06         | 0.17         | 13          | 10,149,504    | 0.1 | 0.1          | 0.2          |
|             |             | 65+ y/o   | 2            | 4,083,277     | 0.05 | 0.01         | 0.2          | 20          | 2,949,540     | 0.7 | 0.4          | 1.1          |
|             | No          | 0-4 y/o   | ..           | ..            | ..   | ..           | ..           | 2           | 877,793       | 0.2 | 0.1          | 0.9          |
|             |             | 5-14 y/o  | ..           | ..            | ..   | ..           | ..           | 2           | 1,776,590     | 0.1 | 0.03         | 0.4          |
|             |             | 15-64 y/o | 21           | 14,795,205    | 0.1  | 0.09         | 0.21         | 12          | 10,149,504    | 0.1 | 0.1          | 0.2          |
|             |             | 65+ y/o   | 1            | 4,083,277     | 0.02 | 0            | 0.14         | 31          | 2,949,540     | 1.1 | 0.7          | 1.5          |
| HCoV-NL63   | Total       | 0-4 y/o   | ..           | ..            | ..   | ..           | ..           | 46          | 877,793       | 5.2 | 3.9          | 6.9          |
|             |             | 5-14 y/o  | ..           | ..            | ..   | ..           | ..           | 2           | 1,776,590     | 0.1 | 0.03         | 0.4          |
|             |             | 15-64 y/o | 31           | 14,795,205    | 0.2  | 0.1          | 0.3          | 15          | 10,149,504    | 0.1 | 0.1          | 0.2          |
|             |             | 65+ y/o   | 4            | 4,083,277     | 0.1  | 0.04         | 0.3          | 21          | 2,949,540     | 0.7 | 0.5          | 1.1          |
|             | Yes         | 0-4 y/o   | ..           | ..            | ..   | ..           | ..           | 25          | 877,793       | 2.9 | 1.9          | 4.2          |
|             |             | 5-14 y/o  | ..           | ..            | ..   | ..           | ..           | 1           | 1,776,590     | 0.1 | 0.01         | 0.4          |

|           |       |           |    |            |      |      |      |    |            |      |      |      |
|-----------|-------|-----------|----|------------|------|------|------|----|------------|------|------|------|
|           |       | 15-64 y/o | 6  | 14,795,205 | 0.04 | 0.02 | 0.09 | 3  | 10,149,504 | 0.03 | 0.01 | 0.1  |
|           |       | 65+ y/o   | 1  | 4,083,277  | 0.02 | 0    | 0.14 | 5  | 2,949,540  | 0.2  | 0.1  | 0.4  |
|           | No    | 0-4 y/o   | .. | ..         | ..   | ..   | ..   | 21 | 877,793    | 2.4  | 1.6  | 3.7  |
|           |       | 5-14 y/o  | .. | ..         | ..   | ..   | ..   | 1  | 1,776,590  | 0.1  | 0.01 | 0.4  |
|           |       | 15-64 y/o | 25 | 14,795,205 | 0.17 | 0.11 | 0.25 | 12 | 10,149,504 | 0.1  | 0.1  | 0.2  |
|           |       | 65+ y/o   | 3  | 4,083,277  | 0.07 | 0.02 | 0.22 | 16 | 2,949,540  | 0.5  | 0.3  | 0.9  |
| HCoV-OC43 | Total | 0-4 y/o   | .. | ..         | ..   | ..   | ..   | 79 | 877,793    | 9    | 7.2  | 11.2 |
|           |       | 5-14 y/o  | .. | ..         | ..   | ..   | ..   | 5  | 1,776,590  | 0.3  | 0.1  | 0.7  |
|           |       | 15-64 y/o | 76 | 14,795,205 | 0.5  | 0.4  | 0.6  | 34 | 10,149,504 | 0.3  | 0.2  | 0.4  |
|           |       | 65+ y/o   | 11 | 4,083,277  | 0.3  | 0.2  | 0.5  | 78 | 2,949,540  | 2.6  | 2.1  | 3.2  |
|           | Yes   | 0-4 y/o   | .. | ..         | ..   | ..   | ..   | 54 | 877,793    | 6.2  | 4.7  | 8.0  |
|           |       | 5-14 y/o  | .. | ..         | ..   | ..   | ..   | 4  | 1,776,590  | 0.2  | 0.1  | 0.6  |
|           |       | 15-64 y/o | 17 | 14,795,205 | 0.11 | 0.07 | 0.18 | 8  | 10,149,504 | 0.1  | 0.04 | 0.2  |
|           |       | 65+ y/o   | 2  | 4,083,277  | 0.05 | 0.01 | 0.2  | 17 | 2,949,540  | 0.6  | 0.4  | 1    |
|           | No    | 0-4 y/o   | .. | ..         | ..   | ..   | ..   | 25 | 877,793    | 2.9  | 1.9  | 4.2  |
|           |       | 5-14 y/o  | .. | ..         | ..   | ..   | ..   | 1  | 1,776,590  | 0.1  | 0.01 | 0.4  |
|           |       | 15-64 y/o | 59 | 14,795,205 | 0.4  | 0.31 | 0.52 | 26 | 10,149,504 | 0.3  | 0.2  | 0.4  |
|           |       | 65+ y/o   | 9  | 4,083,277  | 0.22 | 0.11 | 0.42 | 61 | 2,949,540  | 2.1  | 1.6  | 2.7  |

.. no data

Abbreviations: HCoV = human coronavirus, Nr = number, IR = incidence rate, CI = confidence interval, y/o = years of age.

**1.5 SUPPLEMENTARY TABLE 5: COMPLICATIONS OR DEATH IN HOSPITALIZED PATIENTS WITH SEASONAL CORONAVIRUS INFECTION WITHOUT AND WITH COINFECTION WITH OTHER RESPIRATORY VIRUSES BY AGE GROUP IN BELGIUM 2015-2020.**

|                 | Single HCoV |                                                              |                                                           | Coinfection |                                                              |                                                           | Chi2*   |
|-----------------|-------------|--------------------------------------------------------------|-----------------------------------------------------------|-------------|--------------------------------------------------------------|-----------------------------------------------------------|---------|
|                 | Total       | Patients without complications or death, n (% <sup>R</sup> ) | Patients with complications or death, n (% <sup>R</sup> ) | Total       | Patients without complications or death, n (% <sup>R</sup> ) | Patients with complications or death, n (% <sup>R</sup> ) | P-value |
| <b>0-4 y/o</b>  | 39          | 34 (87.2%)                                                   | 5 (12.8%)                                                 | 66          | 42 (63.6%)                                                   | 24 (36.4%)                                                | 0.017   |
| <b>5-14 y/o</b> | 4           | 1 (25%)                                                      | 3 (75%)                                                   | 4           | 3 (75%)                                                      | 1 (25%)                                                   |         |
| <b>≥ 15 y/o</b> | 109         | 60 (55%)                                                     | 49 (45%)                                                  | 40          | 32 (80%)                                                     | 8 (20%)                                                   | 0.0097  |
| <b>Total</b>    | 152         | 95 (62.5%)                                                   | 57 (37.5%)                                                | 110         | 77 (70%)                                                     | 33 (30%)                                                  |         |

\*Pearson's Chi-squared test with Yates' continuity correction  
 Abbreviations: HCoV = human coronavirus, y/o = years of age.



## 2 SUPPLEMENTARY FIGURES

### 2.1 SUPPLEMENTARY FIGURE 1: DETECTION OF SARS-CoV2 EMERGENCE THROUGH THE PRIMARY CARE (ILI) (A) AND HOSPITAL (SARI) (B) SENTINEL SURVEILLANCE SYSTEMS IN BELGIUM 2020.

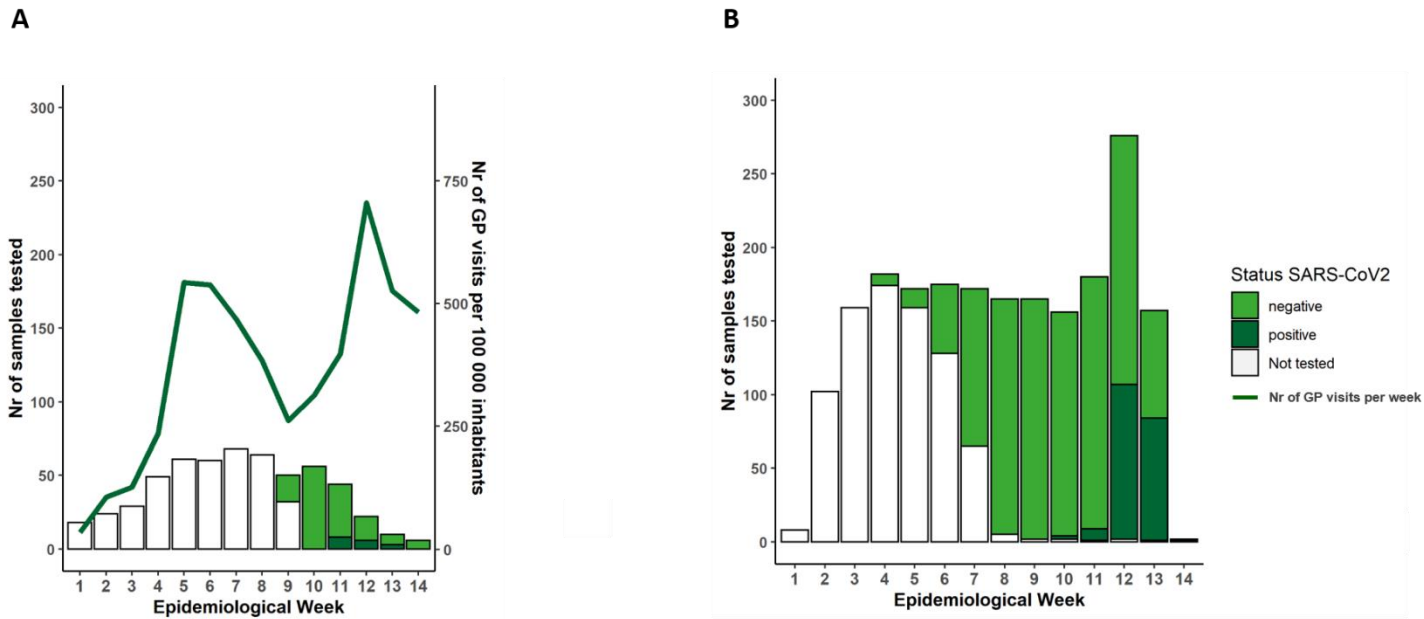

In 2020 the National Influenza Center established testing of samples collected through the primary care (A) and hospital (B) influenza surveillance systems in Belgium for the presence of SARS-CoV-2 (white bars = not tested, light green bars = negative test, dark green = positive test). The number of visits to the general practitioner network was recorded through the surveillance network (A, green line).

## 3 SUPPLEMENTARY METHODS

### 3.1 LABORATORY METHODS AND MATERIALS

#### 3.1.1 PCR primers and probes

| <b>Respiratory syncytial virus A</b> |                                                                |
|--------------------------------------|----------------------------------------------------------------|
| RSVQA1                               | GCT CTT AGC AAA GTC AAG TTG AAT GA                             |
| RSVQA2                               | TGC TCC GTT GGA TGG TGT ATT                                    |
| RSVQA PROBE (HEX)                    | 5HEX/ACA CTC AAC /ZEN/AAA GAT CAA CTT CTG TCA TCC AGC /3IABkFQ |
| <b>Respiratory syncytial virus B</b> |                                                                |
| RSVQB1                               | GAT GGC TCT TAG CAA AGT CAA GTT AA                             |
| RSVQB2                               | TGT CAA TAT TAT CTC CTG TAC TAC GTT GAA                        |
| RSVQB PROBE (TEX 615)                | 5TEX615/TGA TAC ATT AAA TAA GGA TCA GCT GCT GTC ATC CA/3BHQ_2  |
| <b>Human metapneumovirus</b>         |                                                                |
| hMPV P1                              | CAT ATA AGC ATG CTA TAT TAA AAG AGT CTC                        |
| hMPV P2                              | CCT ATT TCT GCA GCA TAT TTG TAA TCA G                          |
| hMPV PROBE (Cy5)                     | 5Cy5/TGY AAT GAT GAG GGT GTC ACT GCG GTT G/3BHQ_2              |
| <b>Enterovirus</b>                   |                                                                |
| EV08-1                               | GGT GCG AAG AGT CTA TTG AGC                                    |
| EV08-2                               | CAC CCA AAG TAG TCG GTT CC                                     |
| EV08p (FAM/ZEN)                      | 56-FAM/CCG GCC CCT /ZEN/GAA TGC /3IABkFQ                       |
| <b>Parainfluenza virus 1</b>         |                                                                |
| PIV1 X1                              | TCA CTC TAC CAA CAA CCA CAC A                                  |
| PIV1 X2                              | GCC TTC GTG CAA TCT TGT TT                                     |
| PIV1 PROBE (TEX615)                  | 5TEX615/CAC GAT TCA TGG TGC AGA AGA ACT YGA /3BHQ_2            |
| <b>Parainfluenza virus 2</b>         |                                                                |
| PIV2s                                | CCA TTT ACC TAA GTG ATG GAA                                    |
| PIV2s                                | CGT GGC ATA ATC TTC TTT TT                                     |
| PIV2 PROBE (HEX/ZEN)                 | 5HEX/AAT CGC AAA /ZEN/AGC TGT TCA GTC AC/3IABkFQ               |
| <b>Parainfluenza virus 3</b>         |                                                                |
| PIV3 X1                              | AAA TGA TCT GAT TTA TGC TTA TAC CTC                            |
| PIV3 X2                              | TCA GGT ACC AAG TCT GAG TTT ACA                                |
| PIV3 X PROBE (FAM/ZEN)               | 56-FAM/CGA GGT TGY /ZEN/CAG GAT ATA GGA AAA TCA /3IABkFQ       |
| <b>Parainfluenza virus 4</b>         |                                                                |
| F-PIV4                               | ATG GTG GGA GAY ATT GCA AAA TGG TGG GAG AYA TTG CAA A          |
| R-PIV4                               | CCA AGC CGA ACT TAA GYG TAA                                    |
| P-PIV4 (HEX)                         | 5HEX/ATA TAG CYA ATG TCG GAA TGA GYG CGT TCT TT/3BHQ_1         |
| <b>Adenovirus</b>                    |                                                                |
| AD1                                  | GCC ACG GTG GGG TTT CTA AAC TT                                 |
| AD2                                  | GCC CCA GTG GTC TTA CAT GCA CAT C                              |
| AD PROBE (Cy5)                       | 5Cy5/TGC ACC AGA CCC GGG CTC AGG TAC TCC GA/3BHQ_2             |
| <b>Coronavirus 229E</b>              |                                                                |
| Cor229-1                             | CAG TCA AAT GGG CTG ATG CA                                     |
| Cor229-2                             | AAA GGG CTA TAA AGA GAA TAA GGT ATT CT                         |
| Cor229- PROBE (TEX615)               | 5TEX615/CCC TGA CGA CCA CGT TGT GGT TCA /3BHQ_2                |
| <b>Coronavirus OC43</b>              |                                                                |
| OC43-1                               | CGA TGA GGC TAT TCC GAC TAG GT                                 |
| OC43-2                               | CCT TCC TGA GCC TTC AAT ATA GTA ACC                            |
| OC43- PROBE (HEX/ZEN)                | 5HEX/TCC GCC TGG /ZEN/CAC GGT ACT CCC T/3IABkFQ                |
| <b>Coronavirus NL63</b>              |                                                                |
| NL63 P1                              | TTG TTC TGT TTT TAA CTT GGT TGC                                |
| NL63 P2                              | CGT TTA GGA GCC TTG GCA AT                                     |
| NL63 PROBE (Cy5)                     | 5Cy5/TTT ACG TAC TTC TAT TAT GAA GCA TGA /3BHQ_2               |
| <b>Rhinovirus</b>                    |                                                                |
| F1-Rhv                               | TGT GAA GAG CCC CGT GTG                                        |

|                                                        |                                                  |
|--------------------------------------------------------|--------------------------------------------------|
| F2-Rhv                                                 | TGT GAA GAC TCG CAT GTG                          |
| R-Rhv                                                  | GTA GTC GGT CCC ATC CC                           |
| P-RHV (FAM/ZEN)                                        | 56-FAM/TCC TCC GGC /ZEN/CCC TGA ATG CG/3IABkFQ   |
| <b>Parachovirus</b>                                    |                                                  |
| PE1                                                    | GTG CCT CTG GGG CCA AAA G                        |
| PE2                                                    | TCA GAT CCA TAG TGT CGC TTG TTA C                |
| PE- PROBE (TEX 615)                                    | 5TEX615/CGA AGG ATG CCC AGA AGG TAC CCG T/3BHQ_2 |
| <b>Bocavirus</b>                                       |                                                  |
| Boca 1A                                                | ACT GGC GTC CAG AAA GAA GA                       |
| Boca 2A                                                | TAT GAC GTG GGC TGG ATG TA                       |
| Boca A PROBE (Cy5)                                     | 5Cy5/TGC ACT CGG GAT GTC ACT GGG /3BHQ_2         |
| <b>Enterovirus D-68</b>                                |                                                  |
| EV-D68 FOR                                             | TGTTCCACGGTTGAAAACAA                             |
| EV-D68 REV                                             | TGTCTAGCGTCTCATGGTTTTTCCAC                       |
| EV-D69 probe T                                         | /56-FAM/TCC GCT ATA /ZEN/GTA CTT CG/3IABkFQ/     |
| EV-D69 probe A                                         | /56-FAM/ACC GCT ATA /ZEN/GTA CTT CG/3IABkFQ/     |
| <b>Influenza A virus</b>                               |                                                  |
| InfA Fwd                                               | GACCRATCCTGTCACCTCTGAC                           |
| InfA Rev                                               | AGGGCATTYTTGGACAAAKCGTCTA                        |
| InfA Probe FAM (BHQ-1)                                 | TGCAGTCCTCGCTCACTGGGCACG                         |
| <b>Influenza B virus</b>                               |                                                  |
| InfIB Fwd                                              | AAATACGGTGGATTAATAAAAAGCAA                       |
| InfIB Rev                                              | CCAGCAATAGCTCCGAAGAAA                            |
| InfIB Probe HEX (BHQ-1)                                | CACCCATATTGGGCAATTTCTATGGC                       |
| <b>Ribonuclease P</b>                                  |                                                  |
| RP Fwd                                                 | AGATTTGGACCTGCGAGCG                              |
| RP Rev                                                 | GAGCGGCTGTCTCCACAAGT                             |
| RP Probe ROX (AbRQSp)                                  | TTCTGACCTGAAGGCTCTGCGCG                          |
| <b>Severe acute respiratory syndrome coronavirus 2</b> |                                                  |
| E_Sarbeco_F1                                           | ACAGGTACGTTAATAGTTAATAGCGT                       |
| E_Sarbeco_R2                                           | ATATTGCAGCAGTACGCACACA                           |
| E_Sarbeco_P1 FAM                                       | ACACTAGCCATCCTTACTGCGCTTCG                       |

### 3.1.2 PCR reagents and protocol for respiratory virus multiplex RT-qPCR

|                                               |                                          |           |
|-----------------------------------------------|------------------------------------------|-----------|
| <b>PCR reagent mix:</b>                       |                                          |           |
| 2x PCR Master MIX                             | 12.5 µl                                  |           |
| Primer Mix<br>(5-6 µM primers, 1-2 µM probes) | 2.5 µl                                   |           |
| Superscript RT/Platinum Taq                   | 1 µl                                     |           |
| DNA                                           | 5 µl                                     |           |
| RNAse free water                              | adjust to final reaction volume of 25 µl |           |
| <b>PCR program:</b>                           |                                          |           |
| 50°C                                          | 30 min                                   | 45 cycles |
| 94°C                                          | 5 min                                    |           |
| 94°C                                          | 15 sec                                   |           |
| 55°C                                          | 1 min                                    |           |

### 3.1.3 PCR reagents and protocol for SARS-CoV-2 RT-qPCR

| PCR reagent mix:             |              |           |
|------------------------------|--------------|-----------|
| 2x PCR Master MIX            | 12.5 µl      |           |
| E_Sarbeco_F                  | 0.25 µl      |           |
| E_Sarbeco_R                  | 0.25 µl      |           |
| E_Sarbeco_P                  | 0.5 µl       |           |
| RP Fwd                       | 0.25 µl      |           |
| RP Rev                       | 0.25 µl      |           |
| RP P                         | 0.5 µl       |           |
| MgSO4                        | 0.4 µl       |           |
| Superscript RT/Platinum Taq  | 0.5 µl       |           |
| RNAse free water             | 4.6 µl       |           |
| DNA                          | 5 µl         |           |
| <b>Final reaction volume</b> | <b>25 µl</b> |           |
| PCR program:                 |              |           |
| 55°C                         | 10 min       | 45 cycles |
| 94°C                         | 3 min        |           |
| 94°C                         | 15 sec       |           |
| 58°C                         | 30 sec       |           |

### 3.1.4 Material and equipment used

| Material or equipment                                | Supplier                                               | Catalog number             |
|------------------------------------------------------|--------------------------------------------------------|----------------------------|
| PCR primers and probes                               | Integrated DNA Technologies (IDT), Leuven, Belgium.    |                            |
| SuperScript™III Platinum® One-Step Quantitative Kit  | Invitrogen, Thermo Scientific Fisher, Waltham, MA, USA | Cat#11732-020 or 11745-100 |
| PCR-grade 8-tubes strips and caps                    | Invitrogen, Thermo Scientific Fisher, Waltham, MA, USA | Cat#AM12230                |
| MicroAmp™ Optical 96-Well Reaction Plate             | Applied Biosystems, Foster City, CA, USA               | Cat# 4306737               |
| 1,5 ml reaction tubes                                | Eppendorf, Hamburg, Germany                            | Cat#022363204              |
| Table top centrifuge 5425                            | Eppendorf, Hamburg, Germany                            | Cat#02231010057            |
| Table top centrifuge 5430 for 96-well plates         | Eppendorf, Hamburg, Germany                            | Cat#022620511              |
| Stratagene Real time PCR Machine (MX 3000P or 3005P) | Agilent Technologies, Santa Clara, CA, USA             | Model number: 401513       |

## 3.2 SURVEILLANCE DATA COLLECTION AND ANALYSIS

### 3.2.1 ILI and SARI surveillance in Belgium

Surveillance of ILI was performed every year from week 40 till week 20 through a sentinel system of general practitioners (GP) throughout the country, representing around 1.5% of all Belgian GPs. Patients fulfilling the case definition of acute respiratory infection with onset within the last ten days, with measured fever of  $\geq 38^{\circ}\text{C}$  and cough and/or dyspnea were eligible to participate in the study. The first two ILI patients belonging to two different households each week were sampled. The ILI surveillance system was active for 32 weeks

each season, except in 2019/2020, where surveillance was interrupted in w13 after 22 weeks due to emergence of SARS-CoV-2 in Belgium.

During the influenza epidemic period (from the last week of December or first/second week of January to the third/last week of April, depending on when influenza virus circulation is detected by the ILI network), SARI surveillance was performed through a network of six sentinel hospitals, two in each administrative region (Flanders, Wallonia and Brussels-Capital). During the study period the weeks of active SARI surveillance in Belgium were as following: 2015/2016: week (w) 01-w17; 2016/2017: w01-w13; 2017/2018: w51-w17; 2018/2019: w01-w15; and 2019/2020: w01-w10. All pediatric and adult patients fulfilling the case definition of acute respiratory infection with onset within the last ten days, with history of fever or measured fever of  $\geq 38^{\circ}\text{C}$ , with cough and/or dyspnea and overnight hospitalization were eligible for inclusion in the study.

### **3.2.2 Sample and data collection**

Respiratory specimens collected through these networks were sent to the Belgian NIC, along with detailed clinico-epidemiological data, such as information on age, sex, symptoms and potential risk factors such as pregnancy or comorbidities (chronic respiratory diseases, asthma, chronic cardiovascular diseases, renal insufficiency, obesity, diabetes, hepatic or renal insufficiency, immunodeficiency, neuromuscular disease). Hospitalized patients were followed-up for the occurrence of complications (detection of pneumonia based on chest radiography, development of acute respiratory distress syndrome (ARDS), requirement for respiratory assistance and/or for extracorporeal membrane oxygenation (ECMO), admission in intensive care unit (ICU)), or death (all-cause death) during hospitalization.

### **3.2.3 Determination of the GP and sentinel hospital catchment population**

In the GP sentinel network, the catchment population represents the average number of patients that are covered by the GP network per district. To weekly estimate the population covered by the network, the number of inhabitants per active GP (defined as having at least

500 patient contacts/year based on health insurance data) is calculated in each of the 43 districts of Belgium and further multiplied by the number of sentinel practices that participated in each district that week. Only the catchment population of GPs which reported cases to Sciensano were considered per week.

In Belgium, the Federal Public Service provides, the annual market share of hospital admissions of each Belgian general hospital by municipality and age group. The % market share (of registration year – 2) is applied to the each municipalities population and age group. The sum, over all municipalities and sentinel hospitals, provides us with an age-specific catchment population. There are two limitations that may bias the estimate: the market share is estimated on the basis of hospital admissions and not persons. Moreover, only hospitals with a market share of  $\geq 5\%$  are provided by municipality. The first estimates of this denominator yielded quite plausible catchment populations for each hospital (e.g. in comparison with the number of beds and the regional population structure ) and the derived incidences were comparable with estimates based on other (alas equally less than perfect) data sources

#### **3.2.4 Data analysis tools**

All data analysis and visualization were performed in R Studio (R version version 3.6.3). The `chisq.test` and `fisher.test` function in the `stats` package, version 4.0.0 were used for statistical analysis. The `chisq.test` function in R uses a Yates' continuity correction.

## TABLE OF CONTENTS

---

|          |                                                                                                                                                                                                                       |           |
|----------|-----------------------------------------------------------------------------------------------------------------------------------------------------------------------------------------------------------------------|-----------|
| <b>1</b> | <b>SUPPLEMENTARY TABLES:</b> .....                                                                                                                                                                                    | <b>1</b>  |
| 1.1      | <b>Supplementary Table 1:</b> Test results from the respiratory virus panel of primary care and hospital patient samples during the winter seasons in Belgium 2015-2020 .....                                         | 1         |
| 1.2      | <b>Supplementary Table 2:</b> Coinfections with other respiratory viruses among seasonal coronavirus positive patients in Belgium 2015-2020 per age group. ....                                                       | 2         |
| 1.3      | <b>Supplementary Table 3:</b> Incidence rate of coronavirus infection per 100.000 person-months per winter season in Belgium 2015-2020. ....                                                                          | 3         |
| 1.4      | <b>Supplementary Table 4:</b> Incidence rate of total coronavirus infection, as well as split without and with coinfection, per age group per 100.000 person-months in Belgium 2015-2020. ....                        | 4         |
| 1.5      | <b>Supplementary Table 5:</b> Complications or death in hospitalized patients with seasonal coronavirus infection without and with coinfection with other respiratory viruses by age group in Belgium 2015-2020. .... | 6         |
| <b>2</b> | <b>SUPPLEMENTARY FIGURES</b> .....                                                                                                                                                                                    | <b>7</b>  |
| 2.1      | <b>Supplementary Figure 1:</b> Detection of SARS-CoV2 emergence through the primary care (ILI) (A) and hospital (SARI) (B) sentinel surveillance systems in Belgium 2020. ....                                        | 7         |
| <b>3</b> | <b>SUPPLEMENTARY METHODS</b> .....                                                                                                                                                                                    | <b>8</b>  |
| 3.1      | <b>Laboratory methods and materials</b> .....                                                                                                                                                                         | <b>8</b>  |
| 3.1.1    | PCR primers and probes .....                                                                                                                                                                                          | 8         |
| 3.1.2    | PCR reagents and protocol for respiratory virus multiplex RT-qPCR .....                                                                                                                                               | 9         |
| 3.1.3    | PCR reagents and protocol for SARS-CoV-2 RT-qPCR .....                                                                                                                                                                | 10        |
| 3.1.4    | Material and equipment used .....                                                                                                                                                                                     | 10        |
| 3.2      | <b>Surveillance Data collection and analysis</b> .....                                                                                                                                                                | <b>10</b> |
| 3.2.1    | ILI and SARI surveillance in Belgium .....                                                                                                                                                                            | 10        |
| 3.2.2    | Sample and data collection .....                                                                                                                                                                                      | 11        |
| 3.2.3    | Determination of the GP and sentinel hospital catchment population.....                                                                                                                                               | 11        |
| 3.2.4    | Data analysis tools.....                                                                                                                                                                                              | 12        |

# 1 SUPPLEMENTARY TABLES:

## 1.1 SUPPLEMENTARY TABLE 1: TEST RESULTS FROM THE RESPIRATORY VIRUS PANEL OF PRIMARY CARE AND HOSPITAL PATIENT SAMPLES DURING THE WINTER SEASONS IN BELGIUM 2015-2020

|                                  | <b>Primary Care, n (%<sup>C</sup>)</b> | <b>Hospital, n (%<sup>C</sup>)</b> |
|----------------------------------|----------------------------------------|------------------------------------|
|                                  | <b>Total N = 2,573</b>                 | <b>Total N = 6,494</b>             |
| <b>Coronaviruses</b>             |                                        |                                    |
| HCoV-OC43                        | 87 (3.4%)                              | 196 (3.0%)                         |
| HCoV-229E                        | 39 (1.5%)                              | 91 (1.4%)                          |
| HCoV-NL63                        | 35 (1.4%)                              | 84 (1.3%)                          |
| Multiple Coronaviruses           | 2 (0.1%)                               | 5 (0.1%)                           |
| <b>Other Respiratory Viruses</b> |                                        |                                    |
| Influenza viruses                | 1,328 (51.6%)                          | 2,425 (37.3%)                      |
| RSV                              | 87 (3.4%)                              | 752 (11.6%)                        |
| Picornaviruses                   | 189 (7.3%)                             | 693 (10.7%)                        |
| hMPV                             | 75 (2.9%)                              | 485 (7.5%)                         |
| Adenovirus                       | 32 (1.2%)                              | 378 (5.8%)                         |
| Bocavirus                        | 5 (0.2%)                               | 178 (2.8%)                         |
| Parainfluenza viruses            | 31 (1.2%)                              | 163 (2.5%)                         |

<sup>C</sup> Percentage per column

Abbreviations: HCoV = human coronavirus, RSV = respiratory syncytial viruses, hMPV = human metapneumoviruses.



## 1.2 SUPPLEMENTARY TABLE 2: COINFECTIONS WITH OTHER RESPIRATORY VIRUSES AMONG SEASONAL CORONAVIRUS POSITIVE PATIENTS IN BELGIUM 2015-2020 PER AGE GROUP.

|                                  | Primary care sCoV patients, n (% <sup>C</sup> ) |         |          |                        |                     | Hospital sCoV patients, n (% <sup>C</sup> ) |                      |                      |                       |                      |
|----------------------------------|-------------------------------------------------|---------|----------|------------------------|---------------------|---------------------------------------------|----------------------|----------------------|-----------------------|----------------------|
|                                  | Total<br>(N = 161)                              | 0-4 y/o | 5-14 y/o | 15-64 y/o<br>(N = 143) | 65+ y/o<br>(N = 18) | Total<br>(N = 371)                          | 0-4 y/o<br>(N = 137) | 5-14 y/o<br>(N = 10) | 15-64 y/o<br>(N = 74) | 65+ y/o<br>(N = 150) |
| <b>Coinfections</b>              |                                                 |         |          |                        |                     |                                             |                      |                      |                       |                      |
| With respiratory viruses         | 43 (26.7%)                                      | ..      | ..       | 38 (26.6%)             | 5 (27.8%)           | 161 (43.4%)                                 | 89 (65.0%)           | 6 (60.0%)            | 24 (32.4%)            | 42 (28.0%)           |
| <b>Other Respiratory Viruses</b> |                                                 |         |          |                        |                     |                                             |                      |                      |                       |                      |
| Influenza                        | 34 (21.1%)                                      | ..      | ..       | 30 (21.0%)             | 4 (22.2%)           | 67 (18.1%)                                  | 19 (13.9%)           | 4 (40.0%)            | 17 (23.0%)            | 27 (18.0%)           |
| RSV                              | 3 (1.9%)                                        | ..      | ..       | 3 (2.1%)               | 0 (0.0%)            | 37 (10.0%)                                  | 31 (22.6%)           | 1 (10.0%)            | 1 (1.4%)              | 4 (2.7%)             |
| Picornaviruses                   | 2 (1.2%)                                        | ..      | ..       | 2 (1.4%)               | 0 (0.0%)            | 38 (10.2%)                                  | 24 (17.5%)           | 2 (20.0%)            | 5 (6.8%)              | 7 (4.7%)             |
| Adenovirus                       | 0 (0.0%)                                        | ..      | ..       | 0 (0.0%)               | 0 (0.0%)            | 26 (7.0%)                                   | 23 (16.8%)           | 0 (0.0%)             | 1 (1.4%)              | 2 (1.3%)             |
| hMPV                             | 4 (2.5%)                                        | ..      | ..       | 3 (2.1%)               |                     | 19 (5.1%)                                   | 16 (11.7%)           | 1 (10.0%)            | 0 (0.0%)              | 2 (1.3%)             |
| Parainfluenza Viruses            | 1 (0.6%)                                        | ..      | ..       | 1 (0.7%)               |                     | 10 (2.7%)                                   | 6 (4.4%)             | 0 (0.0%)             | 2 (2.7%)              | 2 (1.3%)             |
| Bocavirus                        | 1 (0.6%)                                        | ..      | ..       | 1 (0.7%)               |                     | 9 (2.5%)                                    | 8 (5.8%)             | 0 (0.0%)             | 1 (1.4%)              | 0 (0.0%)             |

%<sup>C</sup> Percentage per column

Abbreviations: sCoV = seasonal coronavirus, RSV = respiratory syncytial viruses, hMPV = human metapneumoviruses, y/o = years of age.

### 1.3 SUPPLEMENTARY TABLE 3: INCIDENCE RATE OF CORONAVIRUS INFECTION PER 100.000 PERSON-MONTHS PER WINTER SEASON IN BELGIUM 2015-2020.

| Coronavirus | Season    | Primary care |               |      |              |              | Hospital    |               |     |              |              |
|-------------|-----------|--------------|---------------|------|--------------|--------------|-------------|---------------|-----|--------------|--------------|
|             |           | Nr of cases  | Person-months | IR   | Lower 95% CI | Upper 95% CI | Nr of cases | person-months | IR  | Lower 95% CI | Upper 95% CI |
| HCoV-229E   | 2015/2016 | 3            | 4,136,339     | 0.1  | 0.02         | 0.2          | 0           | 3,599,883     | 0   | 0            | 0            |
|             | 2016/2017 | 20           | 3,580,341     | 0.6  | 0.4          | 0.9          | 29          | 2,761,569     | 1.1 | 0.7          | 1.5          |
|             | 2017/2018 | 0            | 4,756,185     | 0    | 0            | 0            | 5           | 4,050,974     | 0.1 | 0.05         | 0.3          |
|             | 2018/2019 | 15           | 3,644,017     | 0.4  | 0.3          | 0.7          | 56          | 3,204,607     | 1.7 | 1.4          | 2.3          |
|             | 2019/2020 | 1            | 2,761,600     | 0.04 | 0.01         | 0.3          | 1           | 2,136,405     | 0   | 0.01         | 0.4          |
| HCoV-NL63   | 2015/2016 | 2            | 4,136,339     | 0.05 | 0.01         | 0.2          | 10          | 3,599,883     | 0.3 | 0.2          | 0.5          |
|             | 2016/2017 | 11           | 3,580,341     | 0.3  | 0.2          | 0.6          | 14          | 2,761,569     | 0.5 | 0.3          | 0.9          |
|             | 2017/2018 | 10           | 4,756,185     | 0.2  | 0.1          | 0.4          | 35          | 4,050,974     | 0.9 | 0.6          | 1.2          |
|             | 2018/2019 | 5            | 3,644,017     | 0.1  | 0.06         | 0.3          | 20          | 3,204,607     | 0.6 | 0.4          | 1.0          |
|             | 2019/2020 | 7            | 2,761,600     | 0.3  | 0.1          | 0.5          | 5           | 2,136,405     | 0.2 | 0.1          | 0.6          |
| HCoV-OC43   | 2015/2016 | 29           | 4,136,339     | 0.7  | 0.5          | 1            | 33          | 3,599,883     | 0.9 | 0.7          | 1.3          |
|             | 2016/2017 | 20           | 3,580,341     | 0.6  | 0.4          | 0.9          | 42          | 2,761,569     | 1.5 | 1.1          | 2            |
|             | 2017/2018 | 13           | 4,756,185     | 0.3  | 0.2          | 0.5          | 32          | 4,050,974     | 0.8 | 0.6          | 1.1          |
|             | 2018/2019 | 14           | 3,644,017     | 0.4  | 0.2          | 0.6          | 74          | 3,204,607     | 2.3 | 1.8          | 2.9          |
|             | 2019/2020 | 11           | 2,761,600     | 0.4  | 0.2          | 0.7          | 15          | 2,136,405     | 0.7 | 0.4          | 1.2          |

Abbreviations: HCoV = human coronavirus, Nr = number, IR = incidence rate, CI = confidence interval.

**1.4 SUPPLEMENTARY TABLE 4: INCIDENCE RATE OF TOTAL SEASONAL CORONAVIRUS INFECTION, AS WELL AS SPLIT WITHOUT AND WITH COINFECTION, PER AGE GROUP PER 100.000 PERSON-MONTHS IN BELGIUM 2015-2020.**

| Coronavirus | Coinfection | Age Group | Primary care |               |      |              |              | Hospital    |               |     |              |              |
|-------------|-------------|-----------|--------------|---------------|------|--------------|--------------|-------------|---------------|-----|--------------|--------------|
|             |             |           | Nr of cases  | Person-months | IR   | Lower 95% CI | Upper 95% CI | Nr of cases | Person-months | IR  | Lower 95% CI | Upper 95% CI |
| HCoV-229E   | Total       | 0-4 y/o   | ..           | ..            | ..   | ..           | ..           | 12          | 877,793       | 1.4 | 0.8          | 2.5          |
|             |             | 5-14 y/o  | ..           | ..            | ..   | ..           | ..           | 3           | 1,776,590     | 0.2 | 0.1          | 0.6          |
|             |             | 15-64 y/o | 36           | 14,795,205    | 0.2  | 0.1          | 0.3          | 25          | 10,149,504    | 0.2 | 0.1          | 0.3          |
|             |             | 65+ y/o   | 3            | 4,083,277     | 0.1  | 0.02         | 0.3          | 51          | 2,949,540     | 1.7 | 1.3          | 2.2          |
|             | Yes         | 0-4 y/o   | ..           | ..            | ..   | ..           | ..           | 10          | 877,793       | 1.1 | 0.6          | 2.1          |
|             |             | 5-14 y/o  | ..           | ..            | ..   | ..           | ..           | 1           | 1,776,590     | 0.1 | 0.01         | 0.4          |
|             |             | 15-64 y/o | 15           | 14,795,205    | 0.1  | 0.06         | 0.17         | 13          | 10,149,504    | 0.1 | 0.1          | 0.2          |
|             |             | 65+ y/o   | 2            | 4,083,277     | 0.05 | 0.01         | 0.2          | 20          | 2,949,540     | 0.7 | 0.4          | 1.1          |
|             | No          | 0-4 y/o   | ..           | ..            | ..   | ..           | ..           | 2           | 877,793       | 0.2 | 0.1          | 0.9          |
|             |             | 5-14 y/o  | ..           | ..            | ..   | ..           | ..           | 2           | 1,776,590     | 0.1 | 0.03         | 0.4          |
|             |             | 15-64 y/o | 21           | 14,795,205    | 0.1  | 0.09         | 0.21         | 12          | 10,149,504    | 0.1 | 0.1          | 0.2          |
|             |             | 65+ y/o   | 1            | 4,083,277     | 0.02 | 0            | 0.14         | 31          | 2,949,540     | 1.1 | 0.7          | 1.5          |
| HCoV-NL63   | Total       | 0-4 y/o   | ..           | ..            | ..   | ..           | ..           | 46          | 877,793       | 5.2 | 3.9          | 6.9          |
|             |             | 5-14 y/o  | ..           | ..            | ..   | ..           | ..           | 2           | 1,776,590     | 0.1 | 0.03         | 0.4          |
|             |             | 15-64 y/o | 31           | 14,795,205    | 0.2  | 0.1          | 0.3          | 15          | 10,149,504    | 0.1 | 0.1          | 0.2          |
|             |             | 65+ y/o   | 4            | 4,083,277     | 0.1  | 0.04         | 0.3          | 21          | 2,949,540     | 0.7 | 0.5          | 1.1          |
|             | Yes         | 0-4 y/o   | ..           | ..            | ..   | ..           | ..           | 25          | 877,793       | 2.9 | 1.9          | 4.2          |
|             |             | 5-14 y/o  | ..           | ..            | ..   | ..           | ..           | 1           | 1,776,590     | 0.1 | 0.01         | 0.4          |

|           |       |           |    |            |      |      |      |    |            |      |      |      |
|-----------|-------|-----------|----|------------|------|------|------|----|------------|------|------|------|
|           |       | 15-64 y/o | 6  | 14,795,205 | 0.04 | 0.02 | 0.09 | 3  | 10,149,504 | 0.03 | 0.01 | 0.1  |
|           |       | 65+ y/o   | 1  | 4,083,277  | 0.02 | 0    | 0.14 | 5  | 2,949,540  | 0.2  | 0.1  | 0.4  |
|           | No    | 0-4 y/o   | .. | ..         | ..   | ..   | ..   | 21 | 877,793    | 2.4  | 1.6  | 3.7  |
|           |       | 5-14 y/o  | .. | ..         | ..   | ..   | ..   | 1  | 1,776,590  | 0.1  | 0.01 | 0.4  |
|           |       | 15-64 y/o | 25 | 14,795,205 | 0.17 | 0.11 | 0.25 | 12 | 10,149,504 | 0.1  | 0.1  | 0.2  |
|           |       | 65+ y/o   | 3  | 4,083,277  | 0.07 | 0.02 | 0.22 | 16 | 2,949,540  | 0.5  | 0.3  | 0.9  |
| HCoV-OC43 | Total | 0-4 y/o   | .. | ..         | ..   | ..   | ..   | 79 | 877,793    | 9    | 7.2  | 11.2 |
|           |       | 5-14 y/o  | .. | ..         | ..   | ..   | ..   | 5  | 1,776,590  | 0.3  | 0.1  | 0.7  |
|           |       | 15-64 y/o | 76 | 14,795,205 | 0.5  | 0.4  | 0.6  | 34 | 10,149,504 | 0.3  | 0.2  | 0.4  |
|           |       | 65+ y/o   | 11 | 4,083,277  | 0.3  | 0.2  | 0.5  | 78 | 2,949,540  | 2.6  | 2.1  | 3.2  |
|           | Yes   | 0-4 y/o   | .. | ..         | ..   | ..   | ..   | 54 | 877,793    | 6.2  | 4.7  | 8.0  |
|           |       | 5-14 y/o  | .. | ..         | ..   | ..   | ..   | 4  | 1,776,590  | 0.2  | 0.1  | 0.6  |
|           |       | 15-64 y/o | 17 | 14,795,205 | 0.11 | 0.07 | 0.18 | 8  | 10,149,504 | 0.1  | 0.04 | 0.2  |
|           |       | 65+ y/o   | 2  | 4,083,277  | 0.05 | 0.01 | 0.2  | 17 | 2,949,540  | 0.6  | 0.4  | 1    |
|           | No    | 0-4 y/o   | .. | ..         | ..   | ..   | ..   | 25 | 877,793    | 2.9  | 1.9  | 4.2  |
|           |       | 5-14 y/o  | .. | ..         | ..   | ..   | ..   | 1  | 1,776,590  | 0.1  | 0.01 | 0.4  |
|           |       | 15-64 y/o | 59 | 14,795,205 | 0.4  | 0.31 | 0.52 | 26 | 10,149,504 | 0.3  | 0.2  | 0.4  |
|           |       | 65+ y/o   | 9  | 4,083,277  | 0.22 | 0.11 | 0.42 | 61 | 2,949,540  | 2.1  | 1.6  | 2.7  |

.. no data

Abbreviations: HCoV = human coronavirus, Nr = number, IR = incidence rate, CI = confidence interval, y/o = years of age.

**1.5 SUPPLEMENTARY TABLE 5: COMPLICATIONS OR DEATH IN HOSPITALIZED PATIENTS WITH SEASONAL CORONAVIRUS INFECTION WITHOUT AND WITH COINFECTION WITH OTHER RESPIRATORY VIRUSES BY AGE GROUP IN BELGIUM 2015-2020.**

|                 | Single HCoV |                                                              |                                                           | Coinfection |                                                              |                                                           | Chi2*   |
|-----------------|-------------|--------------------------------------------------------------|-----------------------------------------------------------|-------------|--------------------------------------------------------------|-----------------------------------------------------------|---------|
|                 | Total       | Patients without complications or death, n (% <sup>R</sup> ) | Patients with complications or death, n (% <sup>R</sup> ) | Total       | Patients without complications or death, n (% <sup>R</sup> ) | Patients with complications or death, n (% <sup>R</sup> ) | P-value |
| <b>0-4 y/o</b>  | 39          | 34 (87.2%)                                                   | 5 (12.8%)                                                 | 66          | 42 (63.6%)                                                   | 24 (36.4%)                                                | 0.017   |
| <b>5-14 y/o</b> | 4           | 1 (25%)                                                      | 3 (75%)                                                   | 4           | 3 (75%)                                                      | 1 (25%)                                                   |         |
| <b>≥ 15 y/o</b> | 109         | 60 (55%)                                                     | 49 (45%)                                                  | 40          | 32 (80%)                                                     | 8 (20%)                                                   | 0.0097  |
| <b>Total</b>    | 152         | 95 (62.5%)                                                   | 57 (37.5%)                                                | 110         | 77 (70%)                                                     | 33 (30%)                                                  |         |

\*Pearson's Chi-squared test with Yates' continuity correction  
 Abbreviations: HCoV = human coronavirus, y/o = years of age.

## 2 SUPPLEMENTARY FIGURES

### 2.1 SUPPLEMENTARY FIGURE 1: DETECTION OF SARS-CoV2 EMERGENCE THROUGH THE PRIMARY CARE (ILI) (A) AND HOSPITAL (SARI) (B) SENTINEL SURVEILLANCE SYSTEMS IN BELGIUM 2020.



In 2020 the National Influenza Center established testing of samples collected through the primary care (A) and hospital (B) influenza surveillance systems in Belgium for the presence of SARS-CoV-2 (white bars = not tested, light green bars = negative test, dark green = positive test). The number of visits to the general practitioner network was recorded through the surveillance network (A, green line).

## 3 SUPPLEMENTARY METHODS

### 3.1 LABORATORY METHODS AND MATERIALS

#### 3.1.1 PCR primers and probes

| <b>Respiratory syncytial virus A</b> |                                                                |
|--------------------------------------|----------------------------------------------------------------|
| RSVQA1                               | GCT CTT AGC AAA GTC AAG TTG AAT GA                             |
| RSVQA2                               | TGC TCC GTT GGA TGG TGT ATT                                    |
| RSVQA PROBE (HEX)                    | 5HEX/ACA CTC AAC /ZEN/AAA GAT CAA CTT CTG TCA TCC AGC /3IABkFQ |
| <b>Respiratory syncytial virus B</b> |                                                                |
| RSVQB1                               | GAT GGC TCT TAG CAA AGT CAA GTT AA                             |
| RSVQB2                               | TGT CAA TAT TAT CTC CTG TAC TAC GTT GAA                        |
| RSVQB PROBE (TEX 615)                | 5TEX615/TGA TAC ATT AAA TAA GGA TCA GCT GCT GTC ATC CA/3BHQ_2  |
| <b>Human metapneumovirus</b>         |                                                                |
| hMPV P1                              | CAT ATA AGC ATG CTA TAT TAA AAG AGT CTC                        |
| hMPV P2                              | CCT ATT TCT GCA GCA TAT TTG TAA TCA G                          |
| hMPV PROBE (Cy5)                     | 5Cy5/TGY AAT GAT GAG GGT GTC ACT GCG GTT G/3BHQ_2              |
| <b>Enterovirus</b>                   |                                                                |
| EV08-1                               | GGT GCG AAG AGT CTA TTG AGC                                    |
| EV08-2                               | CAC CCA AAG TAG TCG GTT CC                                     |
| EV08p (FAM/ZEN)                      | 56-FAM/CCG GCC CCT /ZEN/GAA TGC /3IABkFQ                       |
| <b>Parainfluenza virus 1</b>         |                                                                |
| PIV1 X1                              | TCA CTC TAC CAA CAA CCA CAC A                                  |
| PIV1 X2                              | GCC TTC GTG CAA TCT TGT TT                                     |
| PIV1 PROBE (TEX615)                  | 5TEX615/CAC GAT TCA TGG TGC AGA AGA ACT YGA /3BHQ_2            |
| <b>Parainfluenza virus 2</b>         |                                                                |
| PIV2s                                | CCA TTT ACC TAA GTG ATG GAA                                    |
| PIV2s                                | CGT GGC ATA ATC TTC TTT TT                                     |
| PIV2 PROBE (HEX/ZEN)                 | 5HEX/AAT CGC AAA /ZEN/AGC TGT TCA GTC AC/3IABkFQ               |
| <b>Parainfluenza virus 3</b>         |                                                                |
| PIV3 X1                              | AAA TGA TCT GAT TTA TGC TTA TAC CTC                            |
| PIV3 X2                              | TCA GGT ACC AAG TCT GAG TTT ACA                                |
| PIV3 X PROBE (FAM/ZEN)               | 56-FAM/CGA GGT TGY /ZEN/CAG GAT ATA GGA AAA TCA /3IABkFQ       |
| <b>Parainfluenza virus 4</b>         |                                                                |
| F-PIV4                               | ATG GTG GGA GAY ATT GCA AAA TGG TGG GAG AYA TTG CAA A          |
| R-PIV4                               | CCA AGC CGA ACT TAA GYG TAA                                    |
| P-PIV4 (HEX)                         | 5HEX/ATA TAG CYA ATG TCG GAA TGA GYG CGT TCT TT/3BHQ_1         |
| <b>Adenovirus</b>                    |                                                                |
| AD1                                  | GCC ACG GTG GGG TTT CTA AAC TT                                 |
| AD2                                  | GCC CCA GTG GTC TTA CAT GCA CAT C                              |
| AD PROBE (Cy5)                       | 5Cy5/TGC ACC AGA CCC GGG CTC AGG TAC TCC GA/3BHQ_2             |
| <b>Coronavirus 229E</b>              |                                                                |
| Cor229-1                             | CAG TCA AAT GGG CTG ATG CA                                     |
| Cor229-2                             | AAA GGG CTA TAA AGA GAA TAA GGT ATT CT                         |
| Cor229- PROBE (TEX615)               | 5TEX615/CCC TGA CGA CCA CGT TGT GGT TCA /3BHQ_2                |
| <b>Coronavirus OC43</b>              |                                                                |
| OC43-1                               | CGA TGA GGC TAT TCC GAC TAG GT                                 |
| OC43-2                               | CCT TCC TGA GCC TTC AAT ATA GTA ACC                            |
| OC43- PROBE (HEX/ZEN)                | 5HEX/TCC GCC TGG /ZEN/CAC GGT ACT CCC T/3IABkFQ                |
| <b>Coronavirus NL63</b>              |                                                                |
| NL63 P1                              | TTG TTC TGT TTT TAA CTT GGT TGC                                |
| NL63 P2                              | CGT TTA GGA GCC TTG GCA AT                                     |
| NL63 PROBE (Cy5)                     | 5Cy5/TTT ACG TAC TTC TAT TAT GAA GCA TGA /3BHQ_2               |
| <b>Rhinovirus</b>                    |                                                                |
| F1-Rhv                               | TGT GAA GAG CCC CGT GTG                                        |

|                                                        |                                                  |
|--------------------------------------------------------|--------------------------------------------------|
| F2-Rhv                                                 | TGT GAA GAC TCG CAT GTG                          |
| R-Rhv                                                  | GTA GTC GGT CCC ATC CC                           |
| P-RHV (FAM/ZEN)                                        | 56-FAM/TCC TCC GGC /ZEN/CCC TGA ATG CG/3IABkFQ   |
| <b>Parachovirus</b>                                    |                                                  |
| PE1                                                    | GTG CCT CTG GGG CCA AAA G                        |
| PE2                                                    | TCA GAT CCA TAG TGT CGC TTG TTA C                |
| PE- PROBE (TEX 615)                                    | 5TEX615/CGA AGG ATG CCC AGA AGG TAC CCG T/3BHQ_2 |
| <b>Bocavirus</b>                                       |                                                  |
| Boca 1A                                                | ACT GGC GTC CAG AAA GAA GA                       |
| Boca 2A                                                | TAT GAC GTG GGC TGG ATG TA                       |
| Boca A PROBE (Cy5)                                     | 5Cy5/TGC ACT CGG GAT GTC ACT GGG /3BHQ_2         |
| <b>Enterovirus D-68</b>                                |                                                  |
| EV-D68 FOR                                             | TGTTCCACGGTTGAAAACAA                             |
| EV-D68 REV                                             | TGTCTAGCGTCTCATGGTTTTTCCAC                       |
| EV-D69 probe T                                         | /56-FAM/TCC GCT ATA /ZEN/GTA CTT CG/3IABkFQ/     |
| EV-D69 probe A                                         | /56-FAM/ACC GCT ATA /ZEN/GTA CTT CG/3IABkFQ/     |
| <b>Influenza A virus</b>                               |                                                  |
| InfA Fwd                                               | GACCRATCCTGTACCTCTGAC                            |
| InfA Rev                                               | AGGGCATTYTTGGACAAAKCGTCTA                        |
| InfA Probe FAM (BHQ-1)                                 | TGCAGTCCTCGCTCACTGGGCACG                         |
| <b>Influenza B virus</b>                               |                                                  |
| InfIB Fwd                                              | AAATACGGTGGATTAATAAAAAGCAA                       |
| InfIB Rev                                              | CCAGCAATAGCTCCGAAGAAA                            |
| InfIB Probe HEX (BHQ-1)                                | CACCCATATTGGGCAATTTCTATGGC                       |
| <b>Ribonuclease P</b>                                  |                                                  |
| RP Fwd                                                 | AGATTTGGACCTGCGAGCG                              |
| RP Rev                                                 | GAGCGGCTGTCTCCACAAGT                             |
| RP Probe ROX (AbRQSp)                                  | TTCTGACCTGAAGGCTCTGCGCG                          |
| <b>Severe acute respiratory syndrome coronavirus 2</b> |                                                  |
| E_Sarbeco_F1                                           | ACAGGTACGTTAATAGTTAATAGCGT                       |
| E_Sarbeco_R2                                           | ATATTGCAGCAGTACGCACACA                           |
| E_Sarbeco_P1 FAM                                       | ACACTAGCCATCCTTACTGCGCTTCG                       |

### 3.1.2 PCR reagents and protocol for respiratory virus multiplex RT-qPCR

|                                               |                                          |           |
|-----------------------------------------------|------------------------------------------|-----------|
| <b>PCR reagent mix:</b>                       |                                          |           |
| 2x PCR Master MIX                             | 12.5 µl                                  |           |
| Primer Mix<br>(5-6 µM primers, 1-2 µM probes) | 2.5 µl                                   |           |
| Superscript RT/Platinum Taq                   | 1 µl                                     |           |
| DNA                                           | 5 µl                                     |           |
| RNAse free water                              | adjust to final reaction volume of 25 µl |           |
| <b>PCR program:</b>                           |                                          |           |
| 50°C                                          | 30 min                                   | 45 cycles |
| 94°C                                          | 5 min                                    |           |
| 94°C                                          | 15 sec                                   |           |
| 55°C                                          | 1 min                                    |           |



### 3.1.3 PCR reagents and protocol for SARS-CoV-2 RT-qPCR

| PCR reagent mix:             |              |           |
|------------------------------|--------------|-----------|
| 2x PCR Master MIX            | 12.5 µl      |           |
| E_Sarbeco_F                  | 0.25 µl      |           |
| E_Sarbeco_R                  | 0.25 µl      |           |
| E_Sarbeco_P                  | 0.5 µl       |           |
| RP Fwd                       | 0.25 µl      |           |
| RP Rev                       | 0.25 µl      |           |
| RP P                         | 0.5 µl       |           |
| MgSO4                        | 0.4 µl       |           |
| Superscript RT/Platinum Taq  | 0.5 µl       |           |
| RNAse free water             | 4.6 µl       |           |
| DNA                          | 5 µl         |           |
| <b>Final reaction volume</b> | <b>25 µl</b> |           |
| PCR program:                 |              |           |
| 55°C                         | 10 min       | 45 cycles |
| 94°C                         | 3 min        |           |
| 94°C                         | 15 sec       |           |
| 58°C                         | 30 sec       |           |

### 3.1.4 Material and equipment used

| Material or equipment                                | Supplier                                               | Catalog number             |
|------------------------------------------------------|--------------------------------------------------------|----------------------------|
| PCR primers and probes                               | Integrated DNA Technologies (IDT), Leuven, Belgium.    |                            |
| SuperScript™III Platinum® One-Step Quantitative Kit  | Invitrogen, Thermo Scientific Fisher, Waltham, MA, USA | Cat#11732-020 or 11745-100 |
| PCR-grade 8-tubes strips and caps                    | Invitrogen, Thermo Scientific Fisher, Waltham, MA, USA | Cat#AM12230                |
| MicroAmp™ Optical 96-Well Reaction Plate             | Applied Biosystems, Foster City, CA, USA               | Cat# 4306737               |
| 1,5 ml reaction tubes                                | Eppendorf, Hamburg, Germany                            | Cat#022363204              |
| Table top centrifuge 5425                            | Eppendorf, Hamburg, Germany                            | Cat#02231010057            |
| Table top centrifuge 5430 for 96-well plates         | Eppendorf, Hamburg, Germany                            | Cat#022620511              |
| Stratagene Real time PCR Machine (MX 3000P or 3005P) | Agilent Technologies, Santa Clara, CA, USA             | Model number: 401513       |

## 3.2 SURVEILLANCE DATA COLLECTION AND ANALYSIS

### 3.2.1 ILI and SARI surveillance in Belgium

Surveillance of ILI was performed every year from week 40 till week 20 through a sentinel system of general practitioners (GP) throughout the country, representing around 1.5% of all Belgian GPs. Patients fulfilling the case definition of acute respiratory infection with onset within the last ten days, with measured fever of  $\geq 38^{\circ}\text{C}$  and cough and/or dyspnea were eligible to participate in the study. The first two ILI patients belonging to two different households each week were sampled. The ILI surveillance system was active for 32 weeks

each season, except in 2019/2020, where surveillance was interrupted in w13 after 22 weeks due to emergence of SARS-CoV-2 in Belgium.

During the influenza epidemic period (from the last week of December or first/second week of January to the third/last week of April, depending on when influenza virus circulation is detected by the ILI network), SARI surveillance was performed through a network of six sentinel hospitals, two in each administrative region (Flanders, Wallonia and Brussels-Capital). During the study period the weeks of active SARI surveillance in Belgium were as following: 2015/2016: week (w) 01-w17; 2016/2017: w01-w13; 2017/2018: w51-w17; 2018/2019: w01-w15; and 2019/2020: w01-w10. All pediatric and adult patients fulfilling the case definition of acute respiratory infection with onset within the last ten days, with history of fever or measured fever of  $\geq 38^{\circ}\text{C}$ , with cough and/or dyspnea and overnight hospitalization were eligible for inclusion in the study.

### **3.2.2 Sample and data collection**

Respiratory specimens collected through these networks were sent to the Belgian NIC, along with detailed clinico-epidemiological data, such as information on age, sex, symptoms and potential risk factors such as pregnancy or comorbidities (chronic respiratory diseases, asthma, chronic cardiovascular diseases, renal insufficiency, obesity, diabetes, hepatic or renal insufficiency, immunodeficiency, neuromuscular disease). Hospitalized patients were followed-up for the occurrence of complications (detection of pneumonia based on chest radiography, development of acute respiratory distress syndrome (ARDS), requirement for respiratory assistance and/or for extracorporeal membrane oxygenation (ECMO), admission in intensive care unit (ICU)), or death (all-cause death) during hospitalization.

### **3.2.3 Determination of the GP and sentinel hospital catchment population**

In the GP sentinel network, the catchment population represents the average number of patients that are covered by the GP network per district. To weekly estimate the population covered by the network, the number of inhabitants per active GP (defined as having at least

500 patient contacts/year based on health insurance data) is calculated in each of the 43 districts of Belgium and further multiplied by the number of sentinel practices that participated in each district that week. Only the catchment population of GPs which reported cases to Sciensano were considered per week.

In Belgium, the Federal Public Service provides, the annual market share of hospital admissions of each Belgian general hospital by municipality and age group. The % market share (of registration year – 2) is applied to the each municipalities population and age group. The sum, over all municipalities and sentinel hospitals, provides us with an age-specific catchment population. There are two limitations that may bias the estimate: the market share is estimated on the basis of hospital admissions and not persons. Moreover, only hospitals with a market share of  $\geq 5\%$  are provided by municipality. The first estimates of this denominator yielded quite plausible catchment populations for each hospital (e.g. in comparison with the number of beds and the regional population structure ) and the derived incidences were comparable with estimates based on other (alas equally less than perfect) data sources

#### **3.2.4 Data analysis tools**

All data analysis and visualization were performed in R Studio (R version version 3.6.3). The `chisq.test` and `fisher.test` function in the `stats` package, version 4.0.0 were used for statistical analysis. The `chisq.test` function in R uses a Yates' continuity correction.
